# Supplementary material for: 1α,25(OH)2D3 Suppresses the Migration of Ovarian Cancer SKOV-3 Cells through the Inhibition of Epithelial–Mesenchymal Transition
Source: PubMed Central journal article supplement (PMC5000682; doi:10.3390/ijms17081285), 2016-08-19
Supplement: ijms-17-01285-s001.pdf [file ijms-17-01285-s001.pdf]

## Supplementary Material: $1\alpha,25(\text{OH})_2\text{D}_3$ Suppresses the Migration of Ovarian Cancer SKOV-3 Cells through the Inhibition of Epithelial–Mesenchymal Transition

Yong-Feng Hou, Si-Hai Gao, Ping Wang, He-Mei Zhang, Li-Zhi Liu, Meng-Xuan Ye, Guang-Ming Zhou, Zeng-Li Zhang and Bing-Yan Li

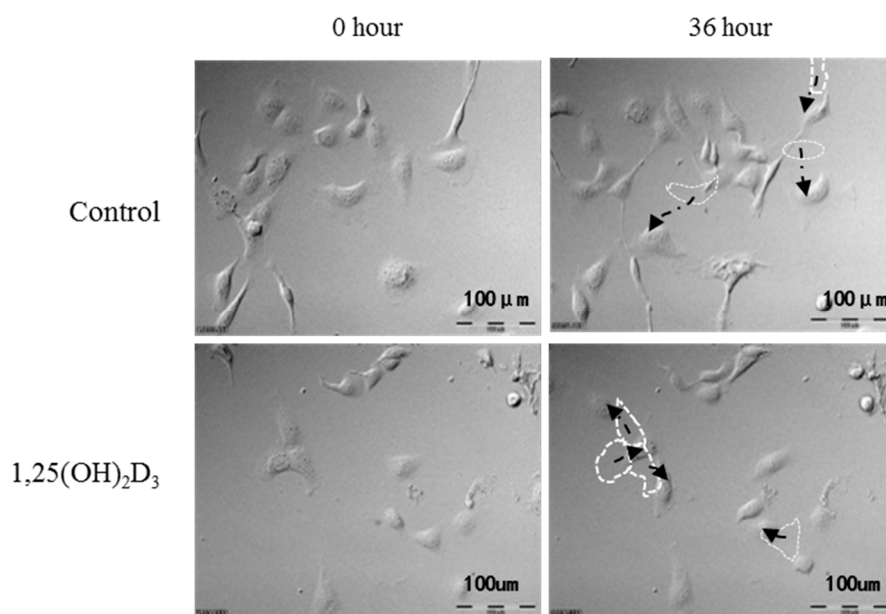

**Figure S1.**  $1\alpha,25(\text{OH})_2\text{D}_3$  slowed down motion tracking of SKOV-3 cells compared with control (Arrows refer to the movement track of SKOV-3 cells).

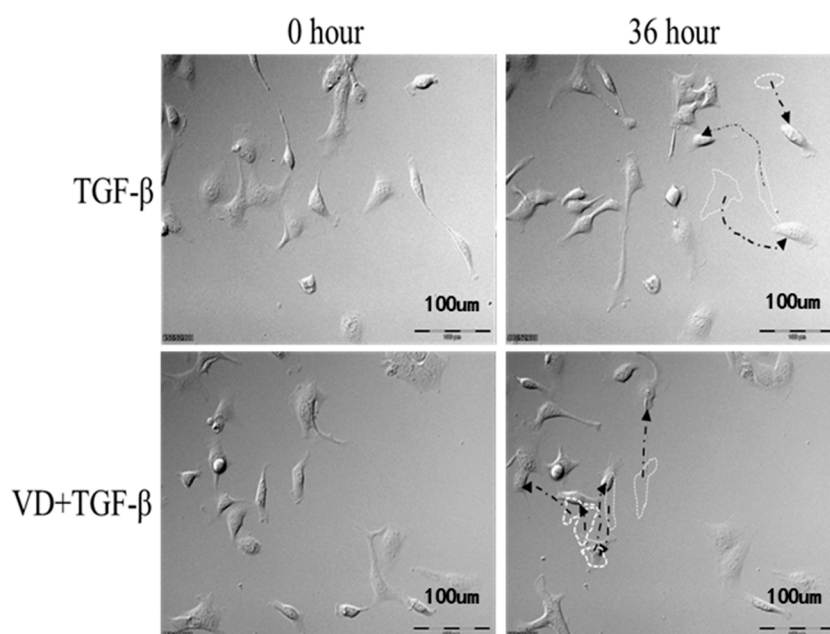

**Figure S2.**  $1\alpha,25(\text{OH})_2\text{D}_3$  shortened the motion distance of SKOV-3 cells exposed to TGF- $\beta$ 1 (Arrows refer to the movement track of SKOV-3 cells).
